# Supplementary material for: Lyn kinase regulates egress of flaviviruses in autophagosome-derived organelles
Source: PubMed Central journal article supplement (PMC7564011; doi:10.1038/s41467-020-19028-w), 2020-10-15
Supplement: 41467_2020_19028_MOESM3_ESM.pdf [file 41467_2020_19028_MOESM3_ESM.pdf]

## Reporting Summary

Nature Research wishes to improve the reproducibility of the work that we publish. This form provides structure for consistency and transparency in reporting. For further information on Nature Research policies, see [Authors & Referees](#) and the [Editorial Policy Checklist](#).

### Statistics

For all statistical analyses, confirm that the following items are present in the figure legend, table legend, main text, or Methods section.

n/a Confirmed

- The exact sample size ( $n$ ) for each experimental group/condition, given as a discrete number and unit of measurement
- A statement on whether measurements were taken from distinct samples or whether the same sample was measured repeatedly
- The statistical test(s) used AND whether they are one- or two-sided  
*Only common tests should be described solely by name; describe more complex techniques in the Methods section.*
- A description of all covariates tested
- A description of any assumptions or corrections, such as tests of normality and adjustment for multiple comparisons
- A full description of the statistical parameters including central tendency (e.g. means) or other basic estimates (e.g. regression coefficient) AND variation (e.g. standard deviation) or associated estimates of uncertainty (e.g. confidence intervals)
- For null hypothesis testing, the test statistic (e.g.  $F$ ,  $t$ ,  $r$ ) with confidence intervals, effect sizes, degrees of freedom and  $P$  value noted  
*Give  $P$  values as exact values whenever suitable.*
- For Bayesian analysis, information on the choice of priors and Markov chain Monte Carlo settings
- For hierarchical and complex designs, identification of the appropriate level for tests and full reporting of outcomes
- Estimates of effect sizes (e.g. Cohen's  $d$ , Pearson's  $r$ ), indicating how they were calculated

*Our web collection on [statistics for biologists](#) contains articles on many of the points above.*

### Software and code

Policy information about [availability of computer code](#)

Data collection

Confocal images were obtained with either a Zeiss Observer Z.1 or an LSM 700 confocal microscope using the Zeiss ZEN software.

Data analysis

ImageJ and FIJI (version 2.0.0-rc-69/1.52p) were used for densitometric and confocal image analyses. Ingenuity Pathway Analyses and Panther were used for performing gene ontology analyses. GraphPad Prism version 8 for statistical analyses, Imaris version 9.2 for colocalizations, SEQUEST HT for database search.

For manuscripts utilizing custom algorithms or software that are central to the research but not yet described in published literature, software must be made available to editors/reviewers. We strongly encourage code deposition in a community repository (e.g. GitHub). See the Nature Research [guidelines for submitting code & software](#) for further information.

### Data

Policy information about [availability of data](#)

All manuscripts must include a [data availability statement](#). This statement should provide the following information, where applicable:

- Accession codes, unique identifiers, or web links for publicly available datasets
- A list of figures that have associated raw data
- A description of any restrictions on data availability

Protein sequences used in this study were extracted from UniprotKB (Human; release 2020\_06 including isoforms and unreviewed sequences; <https://www.uniprot.org/uniprot/>). Protein sequences of Dengue and Zika strains were extracted from UniprotKB. All accession codes of RNAi experiments have been provided in the supplementary information. Source files for immunoblots presented in the manuscript have been provided. The remainder of the data generated or analysed during the current study are available from the corresponding author on reasonable request.

## Field-specific reporting

Please select the one below that is the best fit for your research. If you are not sure, read the appropriate sections before making your selection.

- Life sciences     Behavioural & social sciences     Ecological, evolutionary & environmental sciences

For a reference copy of the document with all sections, see [nature.com/documents/nr-reporting-summary-flat.pdf](https://www.nature.com/documents/nr-reporting-summary-flat.pdf)

## Life sciences study design

All studies must disclose on these points even when the disclosure is negative.

|                 |                                                                                                                                                                                                                                                                                                                                      |
|-----------------|--------------------------------------------------------------------------------------------------------------------------------------------------------------------------------------------------------------------------------------------------------------------------------------------------------------------------------------|
| Sample size     | Samples sizes were selected keeping in mind the variability between independent sources of cells. All experiments were performed in mammalian cell cultures, which are population-based, with data points generated from experiments performed from cells generated from independent clones and performed independent of each other. |
| Data exclusions | No data was excluded.                                                                                                                                                                                                                                                                                                                |
| Replication     | For all experiments data were generated with atleast three independent biological replicates along with atleast 2 technical replicates to calculate the mean and standard deviation. All attempts at replication were successful.                                                                                                    |
| Randomization   | Cells from different clones were independently replicated on atleast 3 separate days, with wells in microtiter plates randomised for treatment conditions, and measurements taken on ~1 x E6 cells from each well.                                                                                                                   |
| Blinding        | No blinding was performed.                                                                                                                                                                                                                                                                                                           |

## Reporting for specific materials, systems and methods

We require information from authors about some types of materials, experimental systems and methods used in many studies. Here, indicate whether each material, system or method listed is relevant to your study. If you are not sure if a list item applies to your research, read the appropriate section before selecting a response.

| Materials & experimental systems    |                                                           | Methods                             |                                                    |
|-------------------------------------|-----------------------------------------------------------|-------------------------------------|----------------------------------------------------|
| n/a                                 | Involved in the study                                     | n/a                                 | Involved in the study                              |
| <input type="checkbox"/>            | <input checked="" type="checkbox"/> Antibodies            | <input checked="" type="checkbox"/> | <input type="checkbox"/> ChIP-seq                  |
| <input type="checkbox"/>            | <input checked="" type="checkbox"/> Eukaryotic cell lines | <input type="checkbox"/>            | <input checked="" type="checkbox"/> Flow cytometry |
| <input checked="" type="checkbox"/> | <input type="checkbox"/> Palaeontology                    | <input checked="" type="checkbox"/> | <input type="checkbox"/> MRI-based neuroimaging    |
| <input checked="" type="checkbox"/> | <input type="checkbox"/> Animals and other organisms      |                                     |                                                    |
| <input checked="" type="checkbox"/> | <input type="checkbox"/> Human research participants      |                                     |                                                    |
| <input checked="" type="checkbox"/> | <input type="checkbox"/> Clinical data                    |                                     |                                                    |

## Antibodies

|                 |                                                                                                                                                                                                                                                                                                                                                                                                                                                                                                                                                                                                                                                                                                                                                                                                                                                                                                                                                                                                                                                                                                                                                                                                                                                                                                                                                                                                                                                                                                                                                                                                   |
|-----------------|---------------------------------------------------------------------------------------------------------------------------------------------------------------------------------------------------------------------------------------------------------------------------------------------------------------------------------------------------------------------------------------------------------------------------------------------------------------------------------------------------------------------------------------------------------------------------------------------------------------------------------------------------------------------------------------------------------------------------------------------------------------------------------------------------------------------------------------------------------------------------------------------------------------------------------------------------------------------------------------------------------------------------------------------------------------------------------------------------------------------------------------------------------------------------------------------------------------------------------------------------------------------------------------------------------------------------------------------------------------------------------------------------------------------------------------------------------------------------------------------------------------------------------------------------------------------------------------------------|
| Antibodies used | conjugated anti-phospho tyrosine antibodies (Cell Signaling Technology, Cat# 9411); anti-E 4G2 (clone D1-4G2-4-15, Novus Biologicals; Cat# 52709); mouse anti-E 4G2 (homemade mouse ascites using hybridoma cells D1-4G2-4-15 from ATCC (Cat No. BH-112); anti-Phospho-Src Family (Tyr 416) ( clone no D49G4, Cell Signaling, Cat no 694 ; rabbit anti-Lyn mAb (Cat no 2796, clone no C13F9, Cell Signaling); rabbit anti-Src mAb (Cat no 2123, clone no 32G6, Cell Signaling Technology); rabbit anti-Fyn - (Cat no 4023, Cell Signaling); Phospho-Tyrosine Mouse mAb(P-Tyr-100) conjugated magnetic beads - Phospho-Tyrosine Mouse mAb (P-Tyr-100), Cat no 8095, Cell Signaling, mouse anti-GAPDH mAb - Anti-GAPDH antibody [6C5], Cat no ab8245, Clone no 6C5, Abcam                                                                                                                                                                                                                                                                                                                                                                                                                                                                                                                                                                                                                                                                                                                                                                                                                           |
| Validation      | anti-E 4G2 (clone D1-4G2-4-15, Novus Biologicals; Cat# 52709) binds to flavivirus group antigen, protein E. Western blotting performed detects the target (band between 55-72kDa). Validated in 3 species: Human, Mouse, Virus for WB, ELISA, ICC/IF. Phospho-Src Family (Tyr416) (D49G4) Rabbit mAb detects endogenous levels of Src only when phosphorylated at Tyr416. Species Reactivity: Human, Mouse, Rat, Monkey. Lyn (C13F9) Rabbit mAb detects endogenous levels of total Lyn protein. This antibody does not cross-react with any other Src-family members. Species Reactivity: Human, Mouse, Rat, Monkey. Fyn Antibody detects endogenous levels of total Fyn proteins. This antibody does not cross-react with Src and Hck family members. Species Reactivity: Human, Mouse. Phospho-Tyrosine Mouse mAb (P-Tyr-100) is a high affinity antibody. ELISAs against a wide variety of phosphopeptides indicate that P-Tyr-100 binds phospho-Tyr in a manner largely independent of the surrounding amino acid sequence. 2D gel Western blot analysis of pervanadate-treated cell extracts also shows that P-Tyr-100 interacts with a broad range of tyrosine-phosphorylated proteins. P-Tyr-100 does not cross-react with peptides containing phospho-Ser or phospho-Thr. Species Reactivity: All Species Expected.<br><br>All antibodies that were purchased from commercial vendors have been validated in different cell types based on their molecular weights and their expression profiles in wild-type and the corresponding knock-down/knock-out models. These data are available |

upon request. In-house generated antibodies and other routine antibodies have been previously described in the following manuscripts:

1. Zhang, J., Lan, Y., Li, M. Y., Lamers, M. M., Fusade-Boyer, M., Klemm, E., Thiele, C., Ashour, J., and Sanyal, S. (2018) Flaviviruses Exploit the Lipid Droplet Protein AUP1 to Trigger Lipophagy and Drive Virus Production. *Cell Host Microbe*. 23, 819–831.e5
2. Li, M. Y., Grandadam, M., Kwok, K., Lagache, T., Siu, Y. L., Zhang, J. S., Sayteng, K., Kudelko, M., Qin, C. F., Olivo-Marin, J.-C., Bruzzone, R., and Wang, P.-G. (2015) KDEL Receptors Assist Dengue Virus Exit from the Endoplasmic Reticulum. *CellReports*. 10, 1496–1507
3. Sanyal S, Ashour J, Maruyama T, Bilate A, Avalos AM, Kundrat L, Altenburg A, Cragolini JJ, Garcia-Sastre A and Ploegh H. (2013) Type-I interferon imposes a Tsg101/ISG15 checkpoint at the Golgi for glycoprotein trafficking during influenza infection *Cell Host and Microbe*, 14(5): 510-521

## Eukaryotic cell lines

Policy information about [cell lines](#)

|                                                                   |                                                                                                                                                                                                                                                                                                                               |
|-------------------------------------------------------------------|-------------------------------------------------------------------------------------------------------------------------------------------------------------------------------------------------------------------------------------------------------------------------------------------------------------------------------|
| Cell line source(s)                                               | Vero E6 - VERO C1008, clone E6, Cat no ATCC® CRL-1586™, BHK-21 [C-13], Cat no ATCC® CCL-10™, HeLa cells, Cat no ATCC®, CCL-2™, HeLa LC3 reporter cells, HeLa-Difluo™ hLC3 cells, Cat no: heldf-hlc3 (Invivogen), Hep G2 [HEPG2], Cat no ATCC® HB-8065™, Huh7, Accegen® Cat no ABC-TC0437, 293T cells, Cat no ATCC® CRL-3216™. |
| Authentication                                                    | All cell lines were purchased from either ATCC or Invivogen, which were characterized and authenticated by short tandem repeat (STR) DNA profiles.                                                                                                                                                                            |
| Mycoplasma contamination                                          | all cell lines tested and confirmed to be negative for mycoplasma                                                                                                                                                                                                                                                             |
| Commonly misidentified lines (See <a href="#">ICLAC</a> register) | No commonly misidentified cell lines (reported by ICLAC) have been used in this study.                                                                                                                                                                                                                                        |

## Flow Cytometry

### Plots

Confirm that:

- The axis labels state the marker and fluorochrome used (e.g. CD4-FITC).
- The axis scales are clearly visible. Include numbers along axes only for bottom left plot of group (a 'group' is an analysis of identical markers).
- All plots are contour plots with outliers or pseudocolor plots.
- A numerical value for number of cells or percentage (with statistics) is provided.

### Methodology

|                           |                                                                                                                                                                                                                                                                                                                                                                                                                                                                                                                                                                                                                                                                                                                                                                                                                                                                         |
|---------------------------|-------------------------------------------------------------------------------------------------------------------------------------------------------------------------------------------------------------------------------------------------------------------------------------------------------------------------------------------------------------------------------------------------------------------------------------------------------------------------------------------------------------------------------------------------------------------------------------------------------------------------------------------------------------------------------------------------------------------------------------------------------------------------------------------------------------------------------------------------------------------------|
| Sample preparation        | At designated time points, the cells were dissociated with 10 mM EDTA in PBS at 37°C. Cells were then stained with 1:200 Zombie NIR™ Fixable Viability Kits or for 10 to 15 minutes. After that, the unbound dyes were neutralized and washed away with FACS buffer (PBS containing 2% FBS and 0.004% sodium azide [w/v]). Cells were washed with FACS buffer and fixed with 4% formaldehyde diluted in PBS. Cells were then permeabilized using BD Perm/Wash Buffer (BD Biosciences; 554723) at room temperature for 20 minutes. Intracellular proteins were then stained with 50 µl of 4G2 antibodies diluted with BD Perm/Wash Buffer on ice for 30 minutes. Cells were then washed with BD Perm/Wash Buffer and resuspended in FACS buffer before data acquisition. The GFP-positive cells (GFP) stained with anti-E MAb 4G2 (4G2) were analyzed by flow cytometry. |
| Instrument                | FACS data was acquired on Attune NxT Flow Cytometer.                                                                                                                                                                                                                                                                                                                                                                                                                                                                                                                                                                                                                                                                                                                                                                                                                    |
| Software                  | All FACS data were analysed using FlowJo 10.                                                                                                                                                                                                                                                                                                                                                                                                                                                                                                                                                                                                                                                                                                                                                                                                                            |
| Cell population abundance | There is no sorting involved in this study.                                                                                                                                                                                                                                                                                                                                                                                                                                                                                                                                                                                                                                                                                                                                                                                                                             |
| Gating strategy           | For all the experiments, cells were first gated on single cells by a forward side scatter gate, followed by GFP gating by excluding dead cells. GFP+ and 4G2 populations were gated in consistence with the corresponding negative controls.                                                                                                                                                                                                                                                                                                                                                                                                                                                                                                                                                                                                                            |

- Tick this box to confirm that a figure exemplifying the gating strategy is provided in the Supplementary Information.
