# Supplementary material for: Lyn kinase regulates egress of flaviviruses in autophagosome-derived organelles
Source: PubMed Central journal article supplement (PMC7564011; doi:10.1038/s41467-020-19028-w), 2020-10-15
Supplement: 41467_2020_19028_MOESM4_ESM.pdf [file 41467_2020_19028_MOESM4_ESM.pdf]

### **Description of Additional Supplementary Files**

File Name: Supplementary Data 1

Description: Raw data for candidates identified by mass spectrometry).
